# Supplementary material for: DNA Sequencing of CD138 Cell Population Reveals TP53 and RAS-MAPK Mutations in Multiple Myeloma at Diagnosis
Source: MDPI journal article supplement (doi:10.3390/cancers16020358), 2024-01-14
Supplement: s1 [file s1]

**Supplementary Table S1.** Sequences of primers used for NGS

1

| Primer             | Sequence                                                        |
|--------------------|-----------------------------------------------------------------|
| BRAF_exo<br>n_15_F | TCGTCGGCAGCGTCAGATGTGTATAAGAGACAGCTGTTTCCTTACTTACTACACCTCA      |
| BRAF_exo<br>n_15_R | GTCTCGTGGGCTCGGAGATGTGTATAAGAGACAGTAATCAGTGGAAAAATAGCCTCAAT     |
| NRAS_exo<br>n_1_F  | TCGTCGGCAGCGTCAGATGTGTATAAGAGACAGGCTCGCCAATTAACCCCTGAT          |
| NRAS_exo<br>n_1_R  | GTCTCGTGGGCTCGGAGATGTGTATAAGAGACAGGGATCATATTCATCTACAAAGTGGTCTG  |
| NRAS_exo<br>n_2_F  | TCGTCGGCAGCGTCAGATGTGTATAAGAGACAGGAAAACAAGTGGTTATAGATGGTGAAA    |
| NRAS_exo<br>n_2_R  | GTCTCGTGGGCTCGGAGATGTGTATAAGAGACAGTGATGGCAAATACACAGAGGAAG       |
| KRAS_exo<br>n_1_F  | TCGTCGGCAGCGTCAGATGTGTATAAGAGACAGTAAGGCCTGCTGAAAATGACTGAATA     |
| KRAS_exo<br>n_1_R  | GTCTCGTGGGCTCGGAGATGTGTATAAGAGACAGGCACCAGTAATATGCATATTAACAAGA   |
| KRAS_exo<br>n_2_F  | TCGTCGGCAGCGTCAGATGTGTATAAGAGACAGGAAACCTGTCTCTTGGATATTCTCG      |
| KRAS_exo<br>n_2_R  | GTCTCGTGGGCTCGGAGATGTGTATAAGAGACAGGCTTATTATATTCAATTTAAACCCACCTA |
| HRAS_exo<br>n_1_F  | TCGTCGGCAGCGTCAGATGTGTATAAGAGACAGCCCCTGAGGAGCGATGACG            |
| HRAS_exo<br>n_1_R  | GTCTCGTGGGCTCGGAGATGTGTATAAGAGACAGCGCCAGGCTCACCTCTATA           |
| HRAS_exo<br>n_2_F  | TCGTCGGCAGCGTCAGATGTGTATAAGAGACAGGATGGGGAGACGTGCCTGTTGG         |
| HRAS_exo<br>n_2_R  | GTCTCGTGGGCTCGGAGATGTGTATAAGAGACAGTGTACTGGTGGATGTCCTCAAAAG      |

**Supplementary Table S2.** Demographic and clinical profile of study subjects.

2

| Parameters                    | Total | Percent |
|-------------------------------|-------|---------|
| Female                        | 27    | 52,94 % |
| Male                          | 24    | 47,05 % |
| Age in years, median          | 61 y  | -       |
| IgG kappa                     | 14    | 27,45 % |
| IgG lambda                    | 10    | 19,60 % |
| IgA kappa                     | 4     | 7,84 %  |
| IgA lambda                    | 7     | 13,72 % |
| IgD lambda                    | 1     | 1,96 %  |
| Free kappa                    | 9     | 17,64 % |
| Free lambda                   | 4     | 7,84 %  |
| <b>Cytogenetics (90,19 %)</b> |       |         |
| t(14;16)                      | 4     | 7,84 %  |
| del17p13                      | 18    | 35,29 % |
| del13q14                      | 2     | 3,92 %  |
| Gain 1q21                     | 11    | 21,56 % |
| t(4;14)                       | 9     | 17,64 % |
| t(11;14)                      | 1     | 1,96 %  |
| del11q                        | 1     | 1,96 %  |
| <b>Risk stratification</b>    |       |         |
| Standard-risk                 | 21    | 41,17%  |
| Intermediate-risk             | 8     | 15,68%  |
| High-risk                     | 22    | 43,13%  |
| <b>ISS Classification</b>     |       |         |
| ISS-I                         | 8     | 15,68 % |

|                                              |           |                |
|----------------------------------------------|-----------|----------------|
| ISS-II                                       | 10        | 19,60 %        |
| ISS-III                                      | 26        | 50,98 %        |
| <b>Induction therapy</b>                     |           |                |
| VRd                                          | 4         | 7,84 %         |
| KRd                                          | 4         | 7,84 %         |
| DaraVTd                                      | 2         | 3,92 %         |
| PAD                                          | 13        | 25,49 %        |
| VelDex                                       | 1         | 1,96 %         |
| CyBorD                                       | 15        | 29,41 %        |
| Dara-CyBorD                                  | 13        | 11,76 %        |
| No treatment                                 | 6         | 25,49 %        |
| <b>Maintenance therapy</b>                   |           |                |
| Lenalidomide                                 | 10        | 19,60 %        |
| KRd                                          | 3         | 5,88 %         |
| LenDex                                       | 3         | 5,88 %         |
| Bortezomib                                   | 2         | 3,92 %         |
| Melphalan                                    | 2         | 3,92 %         |
| VTd                                          | 1         | 1,96 %         |
| <b>Refractory to the last treatment line</b> | <b>11</b> | <b>21,56 %</b> |

**Supplementary Table S3.** Mutations and cytogenetic abnormalities identified in the refractory patient subgroup.

| Refractory patient | Mutation     | Cytogenetics    | Refractory to induction therapy | Refractory to maintenance therapy |
|--------------------|--------------|-----------------|---------------------------------|-----------------------------------|
| 1                  | NRAS p.Q61K  | t(4;14)         |                                 | yes                               |
| 2                  | BRAF p.V640G | del17p, gain 1q | yes                             | yes                               |
| 3                  | KRAS p.G12A  | del17p, t(4;14) | yes                             |                                   |
| 4                  | N/A          | del17p          |                                 | yes                               |
| 5                  | BRAF p.D634N | gain 1q         |                                 | yes                               |
| 6                  | N/A          | N/A             | yes                             | yes                               |
| 7                  | N/A          | N/A             | yes                             |                                   |
| 8                  | N/A          | N/A             |                                 | yes                               |
| 9                  | N/A          | N/A             | yes                             | yes                               |
| 10                 | N/A          | N/A             | yes                             |                                   |
| 11                 | N/A          | N/A             | yes                             |                                   |
